# Supplementary material for: Pyridine interaction with γ-CuI: synergy between molecular dynamics and molecular orbital approaches to molecule/surface interactions
Source: Royal Society of Chemistry journal article supplement (doi:10.1039/d1cp05888f), 2022-01-01
Supplement: d1cp05888f1.pdf [file d1cp05888f1.pdf]

## Supplemental Information (SI)

for

# Pyridine on $\gamma$ -CuI: Synergy between Molecular Dynamic and Molecular Orbital Approaches to Molecule/Surface Interactions

Titouan Duston,<sup>a</sup> Robert D. Pike,<sup>a</sup> David A. Welch,<sup>b</sup> and Aaron D. Nicholas\*<sup>c</sup>

<sup>a</sup> Department of Chemistry, College of William and Mary, Williamsburg, VA 23187, USA.

<sup>b</sup> Department of Physical Sciences, Suffolk County Community College, Selden, NY 11784, USA.

<sup>c</sup> Pacific Northwest National Laboratory, 902 Battelle Boulevard, Richland, WA, 99354, USA.

E-mail: aaron.nicholas@PNNL.gov

### Table of Contents

|                   |                                                                                                      |    |
|-------------------|------------------------------------------------------------------------------------------------------|----|
| <b>Figure S1.</b> | Optimized ground state structures of various DFT methods.....                                        | 01 |
| <b>Table S1.</b>  | Calculated ground state parameters for various DFT methods.....                                      | 02 |
| <b>Table S2.</b>  | B3LYP/lanl2dz derived atomic force tensor (APT) .....                                                | 03 |
| <b>Figure S2.</b> | B3LYP/lanl2dz ideal surface model.....                                                               | 04 |
| <b>Table S3.</b>  | NBO determined orbital interactions and stabilization energies<br>for the ideal surface model .....  | 05 |
| <b>Figure S3.</b> | B3LYP/lanl2dz defect surface model .....                                                             | 06 |
| <b>Figure S4.</b> | B3LYP/lanl2dz defect surface model from above.....                                                   | 07 |
| <b>Figure S5.</b> | Angular distribution of Py molecules for an ideal and kinked surface .....                           | 08 |
| <b>Table S4.</b>  | NBO determined orbital interactions and stabilization energies<br>for the defect surface model ..... | 09 |
| <b>Figure S6.</b> | Angular distribution of Py molecules for the cratered surface MD simulations .....                   | 11 |
| <b>Figure S7.</b> | B3LYP/lanl2dz ideal surface model for a Py molecule nearly parallel to the surface .....             | 12 |
| <b>Table S5.</b>  | NBO determined orbital interactions and stabilization energies<br>for the defect surface model ..... | 13 |

**Figure S1.** Optimized ground state structures of various DFT methods.

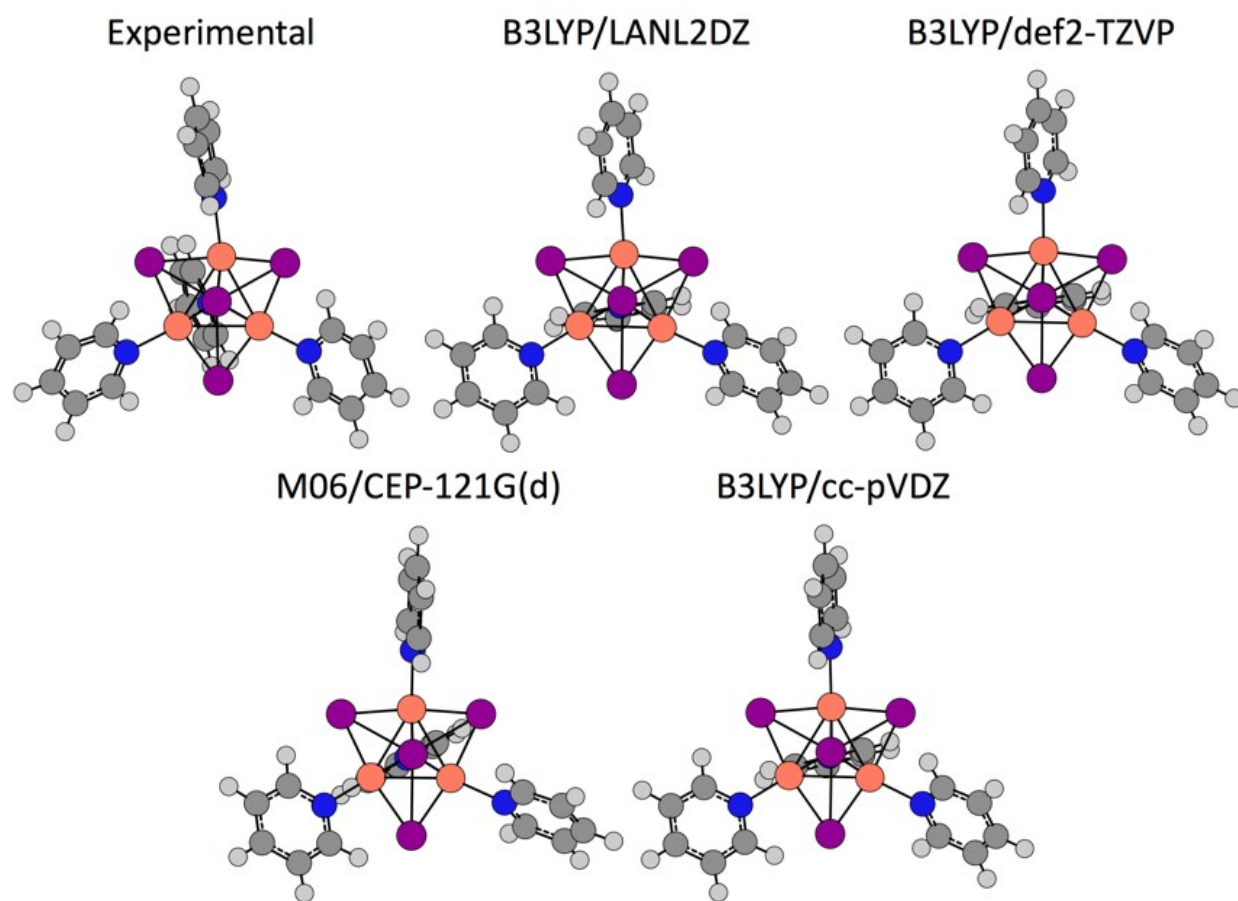

**Table S1.** Calculated ground state parameters for various DFT methods. Values represent averages whereas percentages represent deviations from reported experimental values.

| Method  | Experimental | B3LYP/LANL2DZ    | B3LYP/def2-ZVP   | M06/CEP-121G(d)  | B3LYP/cc-pVDZ    |
|---------|--------------|------------------|------------------|------------------|------------------|
| Cu-I    | 2.7030 Å     | 2.8354 Å (4.9%)  | 2.7724 Å (2.6%)  | 2.7532 Å (1.9%)  | 2.7757 Å (2.7%)  |
| Cu-N    | 2.0403 Å     | 2.0583 Å (0.9%)  | 2.1116 Å (3.5%)  | 2.0202 Å (1.0%)  | 2.0733 Å (1.6%)  |
| Cu...Cu | 2.6900 Å     | 2.6761 Å (0.5%)  | 2.7365 Å (1.7%)  | 2.6311 Å (2.2%)  | 2.6861 Å (0.1%)  |
| I-Cu-I  | 113.0242°    | 113.7075° (0.6%) | 113.3250° (0.3%) | 114.3417° (1.2%) | 113.9675° (0.8%) |
| Cu-I-Cu | 59.6700°     | 58.3883° (2.1%)  | 59.1408° (0.9%)  | 57.0717° (4.4%)  | 57.8592° (3.0%)  |
| I-Cu-N  | 105.4458°    | 104.6850° (0.7%) | 105.2358° (0.2%) | 103.8892° (1.5%) | 104.4150° (1.0%) |

**Table S2.** B3LYP/lanl2dz derived atomic force tensor (APT) values used in Molecular Dynamics simulations.

| Atom | APT Value |  | Atom | APT Value |
|------|-----------|--|------|-----------|
| C    | 0.129369  |  | Cu   | 0.610953  |
| C    | -0.133756 |  | Cu   | 0.612731  |
| C    | 0.078063  |  | Cu   | 0.613975  |
| C    | -0.113638 |  | Cu   | 0.607597  |
| C    | 0.091553  |  | I    | -0.675793 |
| C    | 0.106050  |  | I    | -0.673237 |
| C    | -0.097594 |  | I    | -0.676475 |
| C    | 0.053272  |  | I    | -0.675229 |
| C    | -0.093443 |  | N    | -0.314987 |
| C    | 0.097598  |  | N    | -0.319787 |
| C    | 0.104835  |  | N    | -0.324219 |
| C    | -0.109970 |  | N    | -0.307472 |
| C    | 0.071392  |  | H    | 0.037698  |
| C    | -0.111066 |  | H    | 0.051284  |
| C    | 0.119832  |  | H    | 0.082412  |
| C    | 0.093762  |  | H    | 0.088514  |
| C    | -0.082759 |  | H    | 0.039650  |
| C    | 0.049266  |  | H    | 0.049679  |
| C    | -0.084829 |  | H    | 0.039090  |
| C    | 0.089957  |  | H    | 0.092535  |
| H    | 0.074370  |  | H    | 0.047362  |
| H    | 0.067685  |  | H    | 0.045338  |
| H    | 0.033830  |  | H    | 0.090158  |
| H    | 0.057384  |  | H    | 0.083799  |
| H    | 0.093705  |  | H    | 0.055540  |
| H    | 0.086384  |  | H    | 0.047633  |

| Atom | Avg APT Values |
|------|----------------|
| C    | 0.0128947      |
| Cu   | 0.611314       |
| N    | -0.3166163     |
| H    | 0.0632025      |
| I    | -0.6751835     |

**Figure S2.** B3LYP/lanl2dz ideal surface model. The model contains one pyridine molecule and 4 CuI layers (241 atoms) used for NBO calculations.

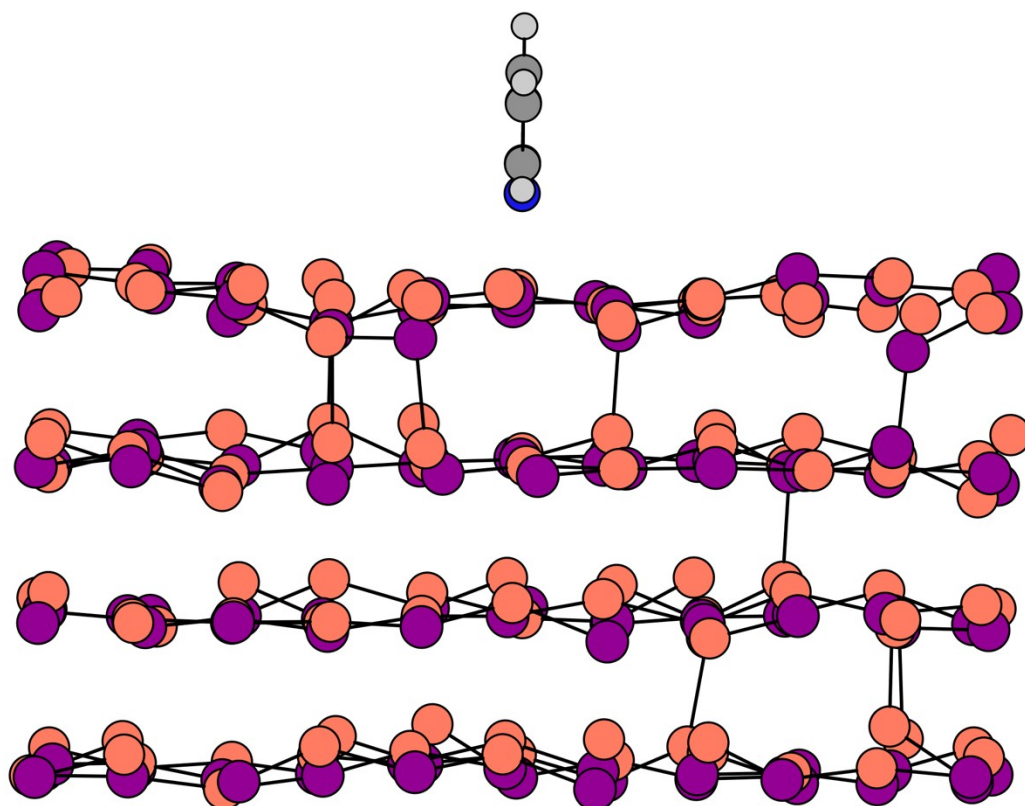

**Table S3.** NBO determined orbital interactions and stabilization energies for the ideal surface model where the Py molecule is perpendicular to the surface.

| Donor Orbital |    |           | Acceptor Orbital |     |            | Stabilization Energy<br>(Kcal mol <sup>-1</sup> ) |
|---------------|----|-----------|------------------|-----|------------|---------------------------------------------------|
| 1454          | BD | C5-H125   | 1630             | BD* | Cu99-I208  | 0.09                                              |
| 1444          | LP | N241      | 1554             | LV  | Cu711      | 4.64                                              |
| 1445          | BD | C1-C2     | 1554             | LV  | Cu71       | 0.38                                              |
| 1446          | BD | C1-H121   | 1554             | LV  | Cu71       | 0.74                                              |
| 1447          | BD | C1-N241   | 1554             | LV  | Cu71       | 0.85                                              |
| 1449          | BD | C2-H122   | 1554             | LV  | Cu71       | 0.07                                              |
| 1452          | BD | C4-C5     | 1554             | LV  | Cu71       | 0.34                                              |
| 1453          | BD | C4-H124   | 1554             | LV  | Cu71       | 0.06                                              |
| 1454          | BD | C5-H125   | 1554             | LV  | Cu71       | 0.17                                              |
| 1455          | BD | C5-N241   | 1554             | LV  | Cu71       | 1.32                                              |
| 1454          | BD | C5-H125   | 1562             | LV  | Cu87       | 0.16                                              |
| 794           | LP | Cu71      | 1644             | 3C* | C1-C2-N241 | 0.06                                              |
| 796           | LP | Cu71      | 1644             | 3C* | C1-C2-N241 | 0.05                                              |
| 1334          | LP | I208      | 1644             | 3C* | C1-C2-N241 | 0.09                                              |
| 1334          | LP | I208      | 1645             | 3C* | C3-C4-C5   | 0.05                                              |
| 1335          | LP | I208      | 1644             | 3C* | C1-C2-N241 | 0.08                                              |
| 1334          | LP | I208      | 1643             | 3Cn | C3-C4-C5   | 0.06                                              |
| 1501          | BD | Cu99-I208 | 1643             | 3Cn | C3-C4-C5   | 0.07                                              |
| 1227          | LP | I178      | 1574             | BD* | C1-C2      | 0.22                                              |
| 1227          | LP | I178      | 1575             | BD* | C1-H121    | 1.73                                              |
| 1229          | LP | I178      | 1574             | BD* | C1-C2      | 0.07                                              |
| 1229          | LP | I178      | 1575             | BD* | C1-H121    | 0.08                                              |
| 792           | LP | Cu71      | 1574             | BD* | C1-C2      | 0.08                                              |
| 792           | LP | Cu71      | 1584             | BD* | C5-N241    | 0.14                                              |
| 794           | LP | Cu71      | 1584             | BD* | C5-N241    | 0.10                                              |
| 1334          | LP | I208      | 1576             | BD* | C1-N241    | 0.14                                              |
| 1334          | LP | I208      | 1581             | BD* | C4-C5      | 0.08                                              |
| 1334          | LP | I208      | 1584             | BD* | C5-N241    | 0.12                                              |
| 1501          | BD | Cu99-I208 | 1581             | BD* | C4-C5      | 0.07                                              |
| 1377          | LP | I221      | 1583             | BD* | C5-H125    | 0.43                                              |
| 1380          | LP | I221      | 1583             | BD* | C5-H125    | 0.10                                              |

**Figure S3.** B3LYP/lanl2dz 16 atom defect surface model. The model contains five Py molecules and three CuI layers (273 atoms) used for NBO calculations. The CuI layer contains 109 Cu atoms and 109 I atoms. The roughly square defect site (l x w x h) is approximately 14.02066 Å x 15.90416 Å x 2.90590 Å, respectively.

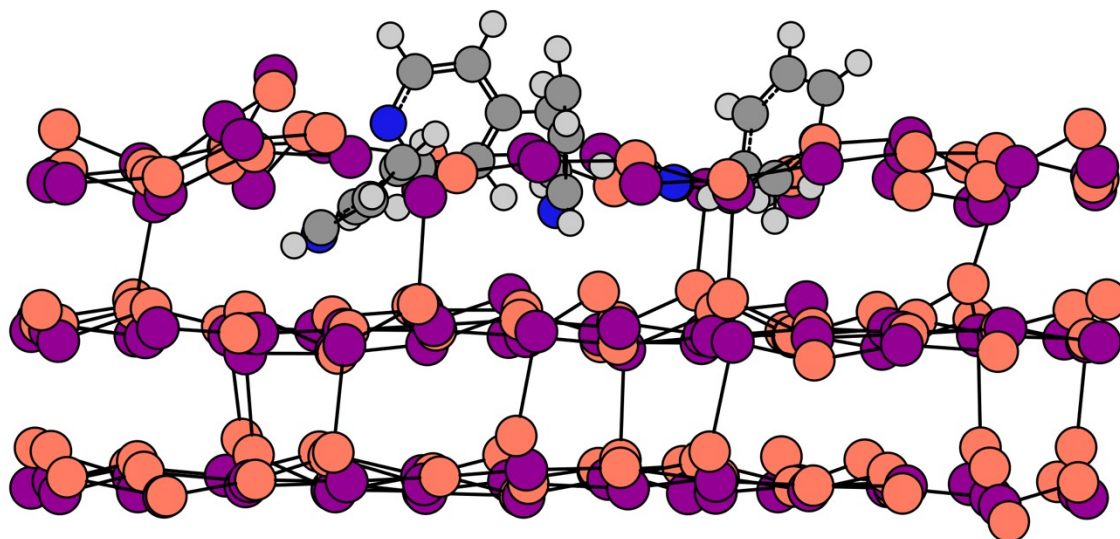

**Figure S4.** B3LYP/lanl2dz defect surface model as viewed from above (bottom three CuI layers removed for clarity) showing the Py positioned over a Cu atom.

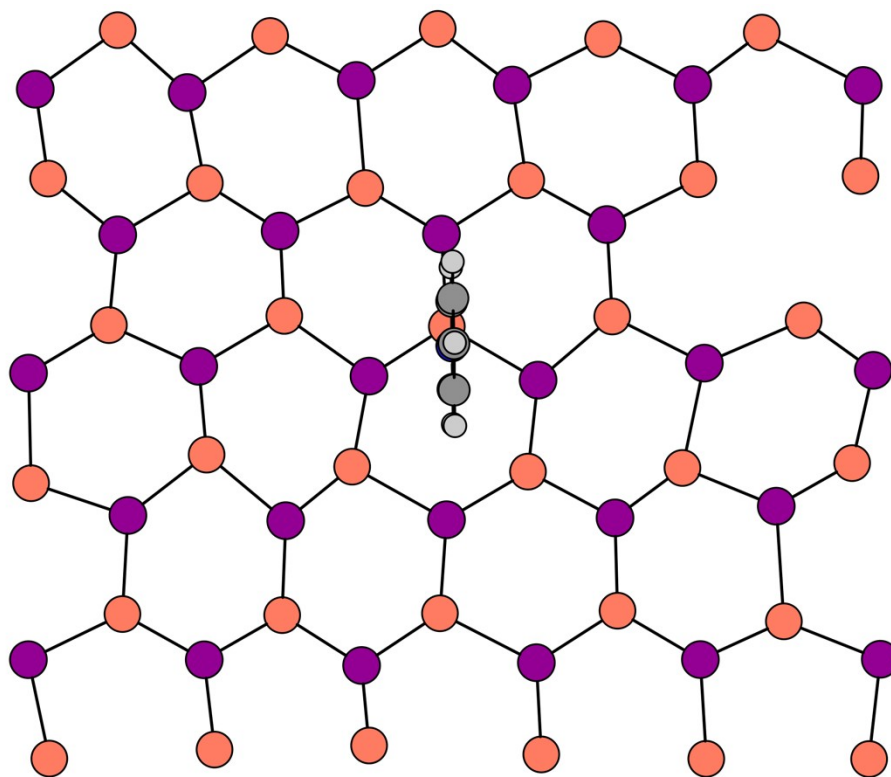



**Figure S5.** Angular distribution of Py molecules (i.e. flat orientation = 0°; upright orientation = 90°) for an ideal and kinked surface.

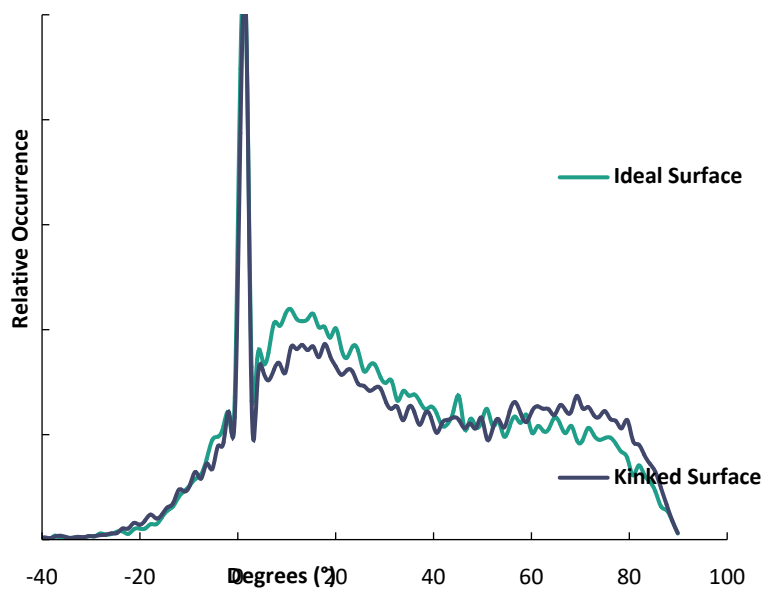

**Table S4.** NBO determined orbital interactions and stabilization energies for the defect surface model.

| Donor Orbital |     |              | Acceptor Orbital |     |              | Stabilization Energy<br>(Kcal mol <sup>-1</sup> ) |
|---------------|-----|--------------|------------------|-----|--------------|---------------------------------------------------|
| 1443          | BD  | C24-H158     | 1680             | BD* | Cu128-I248   | 0.52                                              |
| 1444          | BD  | C25-H159     | 1680             | BD* | Cu128-I248   | 0.06                                              |
| 1436          | BD  | C21-H155     | 1604             | BD* | C16-H150     | 0.05                                              |
| 1436          | BD  | C21-H155     | 1542             | LV  | Cu62         | 0.39                                              |
| 1444          | BD  | C25-H159     | 1545             | LV  | Cu68         | 0.06                                              |
| 1444          | BD  | C25-H159     | 1551             | LV  | Cu80         | 0.49                                              |
| 1390          | LP  | N273         | 1542             | LV  | Cu62         | 6.36                                              |
| 1390          | LP  | N273         | 1551             | LV  | Cu80         | 0.09                                              |
| 1517          | 3C  | C23-C24-C25  | 1598             | BD* | C13-H147     | 0.06                                              |
| 1522          | 3Cn | C21-C22-N273 | 1598             | BD* | C13-H147     | 0.1                                               |
| 1522          | 3Cn | C21-C22-N273 | 1542             | LV  | Cu62         | 0.16                                              |
| 1435          | BD  | C21-C22      | 1542             | LV  | Cu62         | 0.27                                              |
| 1437          | BD  | C21-N273     | 1542             | LV  | Cu62         | 0.24                                              |
| 1442          | BD  | C24-C25      | 1542             | LV  | Cu62         | 0.19                                              |
| 1445          | BD  | C25-N273     | 1542             | LV  | Cu62         | 0.54                                              |
| 1517          | 3C  | C23-C24-C25  | 1680             | BD* | Cu128-I248   | 0.15                                              |
| 1522          | 3Cn | C21-C22-N273 | 1650             | BD* | Cu78-I216    | 0.06                                              |
| 1516          | 3C  | C21-C22-N273 | 1689             | 3Cn | C12-C13-C14  | 0.14                                              |
| 1522          | 3Cn | C21-C22-N273 | 1689             | 3Cn | C12-C13-C14  | 0.07                                              |
| 1522          | 3Cn | C21-C22-N273 | 1592             | BD* | C11-C12      | 0.05                                              |
| 1522          | 3Cn | C21-C22-N273 | 1597             | BD* | C13-C14      | 0.06                                              |
| 981           | LP  | Cu128        | 1622             | BD* | C24-H158     | 0.22                                              |
| 739           | LP  | Cu80         | 1623             | BD* | C25-H159     | 0.12                                              |
| 647           | LP  | Cu62         | 1614             | BD* | C21-C22      | 0.06                                              |
| 647           | LP  | Cu62         | 1624             | BD* | C25-N273     | 0.12                                              |
| 1389          | LP  | N272         | 1700             | 3C  | C21-C22-N273 | 0.63                                              |
| 1090          | LP  | I182         | 1615             | BD* | C21-H155     | 0.45                                              |
| 1092          | LP  | I182         | 1615             | BD* | C21-H155     | 0.14                                              |
| 1116          | LP  | I189         | 1615             | BD* | C21-H155     | 0.06                                              |
| 1156          | LP  | I200         | 1623             | BD* | C25-H159     | 0.12                                              |
| 1177          | LP  | I207         | 1623             | BD* | C25-H159     | 0.92                                              |
| 1218          | LP  | I219         | 1623             | BD* | C25-H159     | 0.07                                              |
| 1289          | LP  | I239         | 1622             | BD* | C24-H158     | 0.64                                              |
| 1290          | LP  | I239         | 1622             | BD* | C24-H158     | 0.07                                              |
| 1291          | LP  | I239         | 1622             | BD* | C24-H158     | 0.06                                              |
| 1292          | LP  | I239         | 1622             | BD* | C24-H158     | 0.29                                              |

|      |     |            |      |     |              |      |
|------|-----|------------|------|-----|--------------|------|
| 1090 | LP  | I182       | 1614 | BD* | C21-C22      | 0.08 |
| 1153 | LP  | I200       | 1700 | 3C* | C21-C22-N273 | 0.08 |
| 1153 | LP  | I200       | 1616 | BD* | C21-N273     | 0.08 |
| 1177 | LP  | I207       | 1691 | 3Cn | C23-C24-C25  | 0.08 |
| 1177 | LP  | I207       | 1621 | BD* | C24-C25      | 0.12 |
| 1289 | LP  | I239       | 1619 | BD* | C23-C24      | 0.15 |
| 1518 | 3Cn | C1-C2-N269 | 1691 | 3Cn | C23-C24-C25  | 0.09 |

**Figure S6.** Angular distribution of Py molecules (i.e. flat orientation =  $0^\circ$ ; upright orientation =  $90^\circ$ ) for the cratered surface MD simulations.

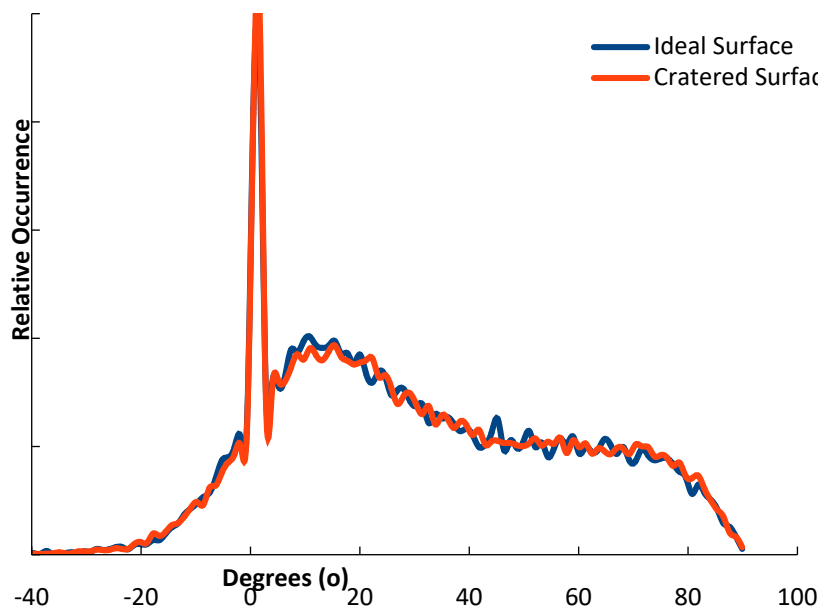

**Figure S7.** B3LYP/lanl2dz ideal surface model for a Py molecule nearly parallel to the surface. The model contains one pyridine molecule and 4 CuI layers (241 atoms) used for NBO calculations.

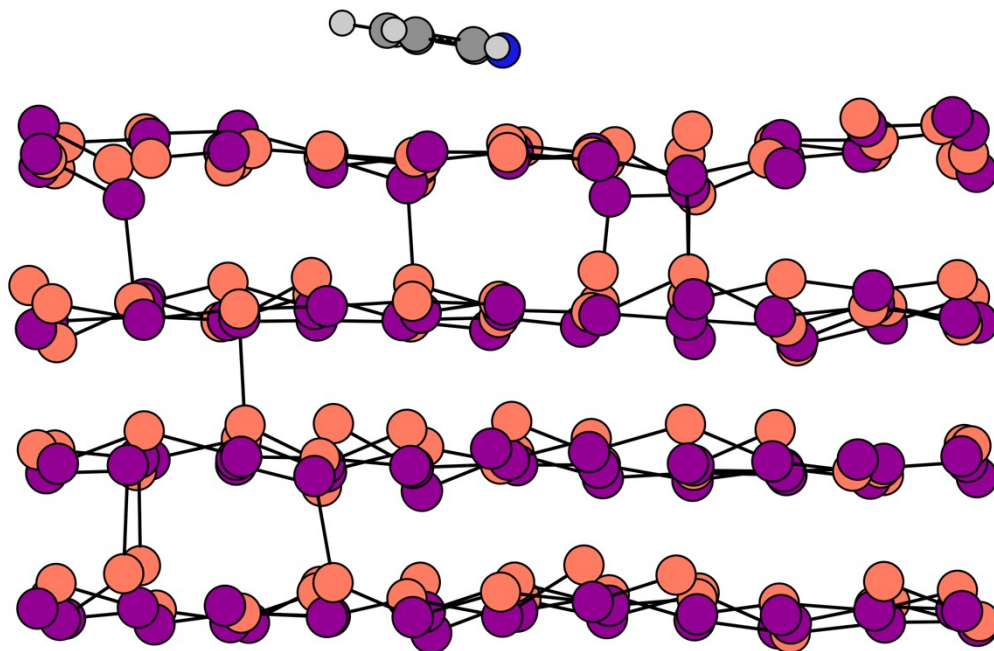

**Table S5.** NBO determined orbital interactions and stabilization energies for the ideal surface model where a Py molecule is nearly parallel to the surface.

| Donor Orbital |    |          | Acceptor Orbital |     |            | Stabilization Energy<br>(Kcal mol <sup>-1</sup> ) |
|---------------|----|----------|------------------|-----|------------|---------------------------------------------------|
| 1227          | LP | I178     | 1644             | 3C* | C1-C2-C3   | 0.24                                              |
| 1229          | LP | I178     | 1644             | 3C* | C1-C2-C3   | 0.31                                              |
| 792           | LP | Cu71     | 1644             | 3C* | C1-C2-C3   | 0.06                                              |
| 793           | LP | Cu71     | 1644             | 3C* | C1-C2-C3   | 0.12                                              |
| 794           | LP | Cu71     | 1645             | 3C* | C4-C5-N241 | 0.09                                              |
| 795           | LP | Cu71     | 1644             | 3C* | C1-C2-C3   | 0.24                                              |
| 795           | LP | Cu71     | 1645             | 3C* | C4-C5-N241 | 0.66                                              |
| 796           | LP | Cu71     | 1644             | 3C* | C1-C2-C3   | 0.18                                              |
| 796           | LP | Cu71     | 1645             | 3C* | C4-C5-N241 | 0.18                                              |
| 1241          | LP | I182     | 1644             | 3C* | C1-C2-C3   | 0.07                                              |
| 1286          | LP | I194     | 1645             | 3C* | C4-C5-N241 | 0.19                                              |
| 1337          | LP | I208     | 1645             | 3C* | C4-C5-N241 | 0.06                                              |
| 1381          | LP | I221     | 1645             | 3C* | C4-C5-N241 | 0.08                                              |
| 1227          | LP | I178     | 1643             | 3Cn | C1-C2-C3   | 1.15                                              |
| 1228          | LP | I178     | 1643             | 3Cn | C1-C2-C3   | 0.08                                              |
| 1229          | LP | I178     | 1643             | 3Cn | C1-C2-C3   | 0.91                                              |
| 792           | LP | Cu71     | 1643             | 3Cn | C1-C2-C3   | 0.39                                              |
| 793           | LP | Cu71     | 1643             | 3Cn | C1-C2-C3   | 0.27                                              |
| 795           | LP | Cu71     | 1643             | 3Cn | C1-C2-C3   | 0.77                                              |
| 796           | LP | Cu71     | 1643             | 3Cn | C1-C2-C3   | 1.29                                              |
| 819           | LP | Cu76     | 1643             | 3Cn | C1-C2-C3   | 0.23                                              |
| 1286          | LP | I194     | 1643             | 3Cn | C1-C2-C3   | 0.07                                              |
| 1336          | LP | I208     | 1643             | 3Cn | C1-C2-C3   | 0.14                                              |
| 1227          | LP | I178     | 1575             | BD* | C1-C2      | 0.07                                              |
| 1227          | LP | I178     | 1576             | BD* | C1-H121    | 0.94                                              |
| 1229          | LP | I178     | 1577             | BD* | C1-N241    | 0.07                                              |
| 1288          | LP | I194     | 1583             | BD* | C4-H124    | 0.06                                              |
| 1334          | LP | I208     | 1577             | BD* | C1-N241    | 0.21                                              |
| 1334          | LP | I208     | 1582             | BD* | C4-C5      | 0.07                                              |
| 1334          | LP | I208     | 1585             | BD* | C5-N241    | 0.1                                               |
| 1336          | LP | I208     | 1577             | BD* | C1-N241    | 0.06                                              |
| 1336          | LP | I208     | 1582             | BD* | C4-C5      | 0.11                                              |
| 1378          | LP | I221     | 1584             | BD* | C5-H125    | 0.31                                              |
| 1450          | BD | C2-H122  | 1547             | LV  | Cu60       | 0.07                                              |
| 1514          | 3C | C1-C2-C3 | 1547             | LV  | Cu60       | 0.06                                              |
| 1445          | LP | N241     | 1554             | LV  | Cu71       | 5.91                                              |

|      |     |            |      |    |      |      |
|------|-----|------------|------|----|------|------|
| 1446 | BD  | C1-C2      | 1554 | LV | Cu71 | 0.93 |
| 1447 | BD  | C1-H121    | 1554 | LV | Cu71 | 1.4  |
| 1448 | BD  | C1-N241    | 1554 | LV | Cu71 | 1.03 |
| 1449 | BD  | C2-C3      | 1554 | LV | Cu71 | 0.22 |
| 1450 | BD  | C2-H122    | 1554 | LV | Cu71 | 0.24 |
| 1451 | BD  | C3-C4      | 1554 | LV | Cu71 | 0.13 |
| 1452 | BD  | C3-H123    | 1554 | LV | Cu71 | 0.11 |
| 1453 | BD  | C4-C5      | 1554 | LV | Cu71 | 0.53 |
| 1454 | BD  | C4-H124    | 1554 | LV | Cu71 | 0.14 |
| 1455 | BD  | C5-H125    | 1554 | LV | Cu71 | 0.49 |
| 1456 | BD  | C5-N241    | 1554 | LV | Cu71 | 0.87 |
| 1514 | 3C  | C1-C2-C3   | 1554 | LV | Cu71 | 0.74 |
| 1515 | 3C  | C4-C5-N241 | 1554 | LV | Cu71 | 1.44 |
| 1516 | 3Cn | C4-C5-N241 | 1554 | LV | Cu71 | 1.78 |
| 1446 | BD  | C1-C2      | 1557 | LV | Cu76 | 0.09 |
| 1450 | BD  | C2-H122    | 1557 | LV | Cu76 | 0.13 |
| 1451 | BD  | C3-C4      | 1557 | LV | Cu76 | 0.09 |
| 1452 | BD  | C3-H123    | 1557 | LV | Cu76 | 0.29 |
| 1453 | BD  | C4-C5      | 1557 | LV | Cu76 | 0.08 |
| 1514 | 3C  | C1-C2-C3   | 1557 | LV | Cu76 | 0.66 |
| 1451 | BD  | C3-C4      | 1562 | LV | Cu87 | 0.08 |
| 1454 | BD  | C4-H124    | 1562 | LV | Cu87 | 0.3  |
| 1455 | BD  | C5-H125    | 1562 | LV | Cu87 | 0.21 |
| 1456 | BD  | C5-N241    | 1562 | LV | Cu87 | 0.09 |
| 1515 | 3C  | C4-C5-N241 | 1562 | LV | Cu87 | 0.32 |
| 1516 | 3Cn | C4-C5-N241 | 1562 | LV | Cu87 | 0.98 |
